# Supplementary material
Source: HighWire-hosted journal article supplement (https://cmaj.ca/highwire/filestream/57869/field_highwire_adjunct_files/2/meta-ley-appendix_3.pdf)
Supplement: meta-ley-appendix_3.pdf [file meta-ley-appendix_3.pdf]

**Appendix 3:** IDF-defined metabolic syndrome (overall and categorical components) and IGT in predicting incident type 2 diabetes after adjustment for age and sex

| Variable             | OR (95% CI)      | <i>p</i> value | C statistic | <i>p</i> value (v. IGT) |
|----------------------|------------------|----------------|-------------|-------------------------|
| Waist circumference* | 3.55 (1.61–7.80) | 0.002          | 0.684       | 0.84                    |
| Triglycerides        | 1.74 (1.02–2.98) | 0.04           | 0.662       | 0.42                    |
| HDL cholesterol*     | 1.58 (0.97–2.57) | 0.06           | 0.659       | 0.34                    |
| Blood pressure       | 2.69 (1.48–4.89) | 0.001          | 0.671       | 0.67                    |
| Blood glucose        | 2.30 (1.43–3.73) | < 0.001        | 0.687       | 0.80                    |
| Metabolic syndrome*  | 2.14 (1.29–3.55) | 0.003          | 0.682       | 0.96                    |
| IGT                  | 2.87 (1.52–5.40) | 0.001          | 0.681       | –                       |

Abbreviations: CI = confidence interval; HDL = high-density lipoprotein; IDF = International Diabetes Federation; IGT = impaired glucose tolerance; OR = odds ratio.  
 \*Age-specific cutoffs used.
